# Supplementary material for: Kidney Replacement Therapy and Mortality in Children With Inborn Errors of Metabolism: A Meta-analysis
Source: PubMed Central journal article supplement — Kidney Med. 2023 Nov 27;6(1):100751. doi: 10.1016/j.xkme.2023.100751 (PMC10801204; doi:10.1016/j.xkme.2023.100751), 2023-11-27
Supplement: mmc1.pdf [file mmc1.pdf]

**Figure S1. Funnel plot evaluating publication bias in studies reporting survival**

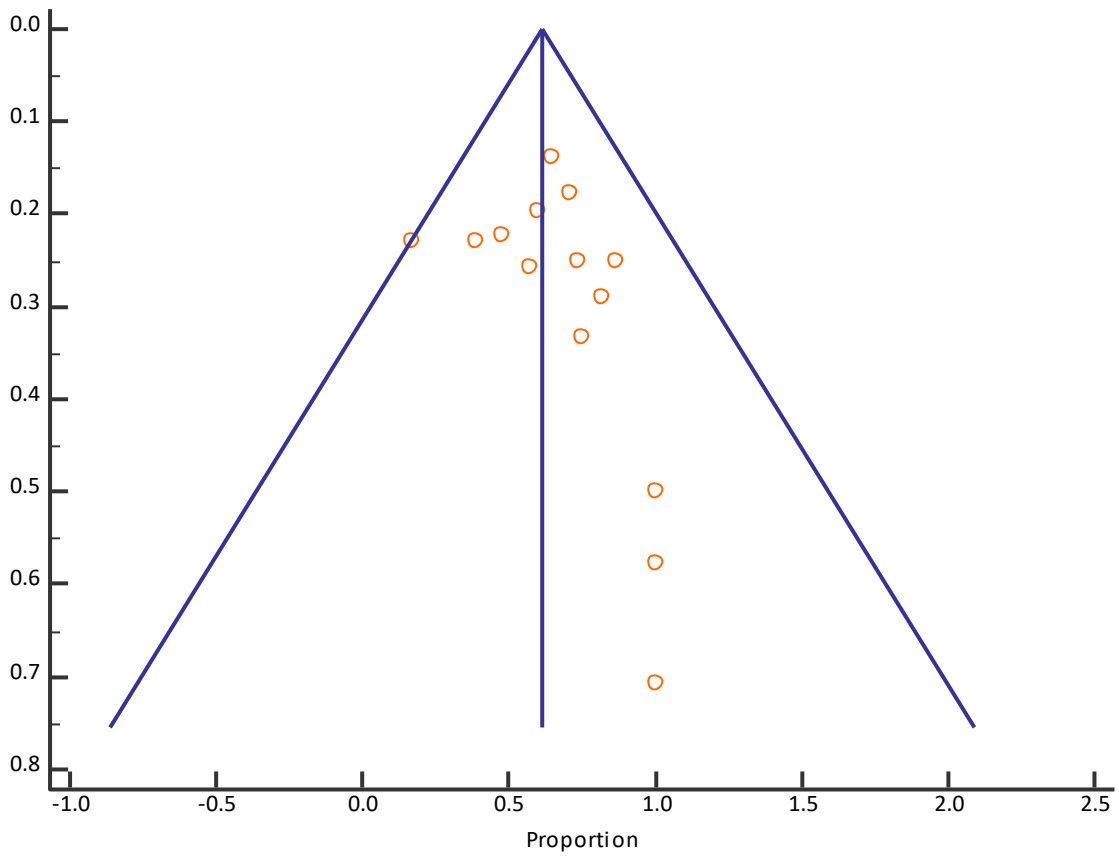

## Item S1: Detailed Methods

The literature search was done by two independent investigators and involved an exhaustive examination through PubMed, Cochrane, CINAHL, Web of Science, and ScienceDirect databases. The Medical subject headings (MeSH) used were "Inborn Errors of Metabolism" and "CRRT". Results were limited to studies in the English language. Selected articles were exported to Rayyan QCR software, where titles, abstracts, and full texts of the collected studies were reviewed by two independent investigators.

Of a total of 249 articles gathered after an initial search from multiple databases, only 14 articles met the inclusion/exclusion criteria for survival analysis. Any disagreements regarding selection criteria for data extraction were resolved by a consensus of the two reviewers or by a third reviewer. The studies selected appropriately for inclusion reported survival rates and ammonia levels in pediatric patients with inborn errors of metabolism (IEM) and were given any modality of kidney replacement therapy as an intervention. There was no restriction on the duration or geography of the studies. Studies reporting patients under 18 years old were included in the analysis. Additionally, only original articles consisting of cross-sectional, prospective, case-reports, and retrospective studies were included in the analysis. Literature reviews, systematic reviews, and self-reported outcomes were excluded from this study. Research ethics committee review was not required for this meta-analysis. Informed consent and local research ethics committee approval were obtained in all original studies included in this review.

Based on the quality assessment, a total of 12 studies were observed to be of good quality, while 2 with fair quality (an overall total of 14 studies included for the study of pooled survival). The analysis included efficacy through survival rates, where the proportion of children surviving with KRT intervention was extracted from each of the studies. The degree of between-study heterogeneity attributed to the variance in reported mortality was assessed using the  $I^2$  test, where  $I^2 \geq 50\%$  indicated high heterogeneity. The overall (pooled) estimate was calculated with a random effects model for high heterogeneity and a fixed effects model for low heterogeneity. To determine the source of heterogeneity, sensitivity analyses were performed based on the following parameters: age, sample size, geography, and study quality. A  $p$ -value  $< 0.05$  was considered for statistical significance. A forest plot was used to visualize these outcomes in each study and the combined estimated outcomes with their 95% CI. Publication bias was assessed graphically using funnel plots and Egger's test, where  $p < 0.05$  was considered statistically significant for small-study bias. All statistical analyses were performed with R software version 3.1.0.

**Table S1. General Characteristics of Included Studies**

| Author                  | Location    | Patients (n) | Age at KRT*                             | Inborn Errors of Metabolism                                                                                        | Mortality (%) |
|-------------------------|-------------|--------------|-----------------------------------------|--------------------------------------------------------------------------------------------------------------------|---------------|
| Ames et al., 2020       | USA         | 19           | 2 days - 15.6 years                     | OTC def. (9), CPS-1 def. (4), ASS def. (2), MMA (1), PA (3)                                                        | 53            |
| Ames et al., 2022       | USA         | 51           | 3 days (0 days - 11 days)               | OTC def. (26), CPS-1 def. (7), ASS def. (6), ASL def (4), MMA (3), PA (5)                                          | 35            |
| Celik et al., 2019      | Turkey      | 14           | 3 days (2 days -10.2 days) <sup>†</sup> | OTC def. (1), ASS def. (6), ASL def (1), MMA (2), PA (3), Unclear (1)                                              | 43            |
| Hakan et al., 2014      | Turkey      | 18           | (1 day – 30 days)                       | UCD (7), MC (8), NKH (3)                                                                                           | 83            |
| Hanudél et al., 2014    | USA         | 2            | 4 days                                  | MMA (1), Unclear (1)                                                                                               | 0             |
| Kim et al., 2011        | South Korea | 1            | 3 days                                  | OTC def. (1)                                                                                                       | 0             |
| Lai et al., 2007        | Taiwan      | 8            | 2 years (11 days – 7 years)             | OTC def. (2), CPS-1 def. (1), MMA (4), MSUD (1)                                                                    | 25            |
| Lee et al., 2016        | South Korea | 11           | 10 days (1 day – 122 day)               | ASS def. (1), Unclear (10)                                                                                         | 18            |
| McBryde et al., 2006    | USA         | 18           | (2 days -17 years)                      | OTC def. (5), CPS-1 def. (1), ASS def. (2), ASL def (3), MMA (3), PA (1), IVA (1), Other (2)                       | 61            |
| Mok et al., 2018        | Taiwan      | 3            | 4 (2 days – 30 days)                    | OTC def. (1), MMA (1), Unclear (1)                                                                                 | 0             |
| Naorungroj et al., 2021 | USA         | 31           | (3 days – 7 years)                      | OTC def. (6), CPS-1 def. (5), ASS def. (10), ASL def (1), MMA (3), PA (3), GA-II (1), Argininemia (1), Unclear (1) | 31            |
| Symons et al., 2007     | USA         | 15           | (Newborn to 25 years)                   | Unclear (15)                                                                                                       | 27            |
| Tsai et al., 2014       | Taiwan      | 15           | (7 days – 7 years)                      | OTC def. (2), CPS-1 def. (1), ASS def. (2), MMA (6) MSUD (4)                                                       | 13            |
| Yetimakman et al., 2019 | Turkey      | 25           | 0.66 years (0.21 years – 4.3 years)     | ASS def. (1), MMA (9), PA (4), MSUD (4), MC (4), MCADD (1), SCADD (1), Unclear (1)                                 | 40            |

\*Data reported as median (range) or (range), as appropriate

† Data reported as median (IQR)

**Abbreviations:** OTC def., ornithine transcarbamylase deficiency; ASS def., argininosuccinate synthetase deficiency (aka citrullinemia); CPS-1 def., carbamoyl phosphate synthetase 1 deficiency; ASL def, argininosuccinate lyase deficiency (aka argininosuccinate acidemia); MMA, methylmalonic acidemia; PA, propionic acidemia; GA-II, glutaric aciduria type II; IVA, isovaleric acidemia; MC, mitochondrial cytopathy; MSUD, maple-syrup urine disease; NKH, nonketotic hyperglycinemia; SCADD, short-chain acyl-CoA dehydrogenase deficiency; MCADD, medium chain acyl-CoA dehydrogenase deficiency; KRT, kidney replacement therapy; and IEM, inborn errors of metabolism.

**Table S2. Inborn errors of metabolism disorders among 231 children reported across gathered studies**

| Inborn Errors of Metabolism |               | Patient Sample (n) | Proportion (%) |
|-----------------------------|---------------|--------------------|----------------|
| Urea cycle disorder         | OTC def.      | 53                 | 22.9           |
|                             | ASS def.      | 30                 | 13.0           |
|                             | CPS-1 def.    | 19                 | 8.2            |
|                             | ASL def.      | 9                  | 3.9            |
|                             | Argininemia   | 1                  | 0.4            |
| Organic acidemia            | MMA           | 33                 | 13.0           |
|                             | PA            | 19                 | 8.0            |
|                             | GA-II         | 1                  | 0.4            |
|                             | IVA           | 1                  | 0.4            |
|                             | MC            | 12                 | 5.2            |
|                             | MSUD          | 9                  | 3.9            |
|                             | NKH           | 3                  | 1.3            |
|                             | SCADD         | 1                  | 0.4            |
|                             | MCADD         | 1                  | 0.4            |
|                             | Other         | 2                  | 0.9            |
|                             | Not specified | 37                 | 16.0           |

**Abbreviations:** OTC def., ornithine transcarbamylase deficiency; ASS def., argininosuccinate synthetase deficiency (aka citrullinemia); CPS-1 def., carbamoyl phosphate synthetase 1 deficiency; ASL def, argininosuccinate lyase deficiency (aka argininosuccinate acidemia); MMA, methylmalonic acidemia; PA, propionic acidemia; GA-II, glutaric aciduria type II; IVA, isovaleric acidemia; MC, mitochondrial cytopathy; MSUD, maple-syrup urine disease; NKH, nonketotic hyperglycinemia; SCADD, short-chain acyl-CoA dehydrogenase deficiency; MCADD, medium chain acyl-CoA dehydrogenase deficiency; and IEM, inborn errors of metabolism.

**Table S3. Survival among children with an inborn error of metabolism**

| <b>Study</b>                  | <b>Survival population size</b> | <b>Sample size</b> | <b>% Proportion (95% CI)</b> | <b>Random Weight (%)</b> |
|-------------------------------|---------------------------------|--------------------|------------------------------|--------------------------|
| Ames et al., 2022             | 33                              | 51                 | 64.7 (50.1 - 77.6)           | 10.66                    |
| Naorungroj et al., 2021       | 22                              | 31                 | 71.0 (52.0 - 85.8)           | 9.70                     |
| Ames et al., 2020             | 9                               | 19                 | 47.4 (24.5 - 71.1)           | 8.50                     |
| Celik et al., 2019            | 8                               | 14                 | 57.1 (28.9 - 82.3)           | 7.66                     |
| Yetimakman et al., 2019       | 15                              | 25                 | 60.0 (38.7 - 78.9)           | 9.20                     |
| Mok et al., 2018              | 3                               | 3                  | 100.0 (29.2 – 100.0)         | 3.67                     |
| Lee et al., 2016              | 9                               | 11                 | 81.8 (48.2 - 97.7)           | 6.98                     |
| Hakan et al., 2014            | 3                               | 18                 | 16.7 (3.6 - 41.4)            | 8.36                     |
| Hanudel et al., 2014          | 2                               | 2                  | 100.0 (15.8 – 100.0)         | 2.97                     |
| Tsai et al., 2014             | 13                              | 15                 | 86.7 (59.5 - 98.3)           | 7.86                     |
| Kim et al., 2011              | 1                               | 1                  | 100.0 (2.5 – 100.0)          | 2.15                     |
| Lai et al., 2007              | 6                               | 8                  | 75.0 (34.9 - 96.8)           | 6.07                     |
| Symons et al., 2007           | 11                              | 15                 | 73.3 (44.9 - 92.2)           | 7.86                     |
| McBryde et al., 2006          | 7                               | 18                 | 38.9 (17.3 - 64.3)           | 8.36                     |
| <b>Total (random effects)</b> | <b>142</b>                      | <b>231</b>         | <b>63.4 (52.4 - 73.7)</b>    | <b>100.00</b>            |

**Abbreviation:** CI, confidence interval
